# Supplementary material for: Evaluation of Somatic Mutations in Solid Metastatic Pan-Cancer Patients
Source: MDPI journal article supplement (doi:10.3390/cancers13112776), 2021-06-03
Supplement: s1 [file s1]

## Supplemental Materials:

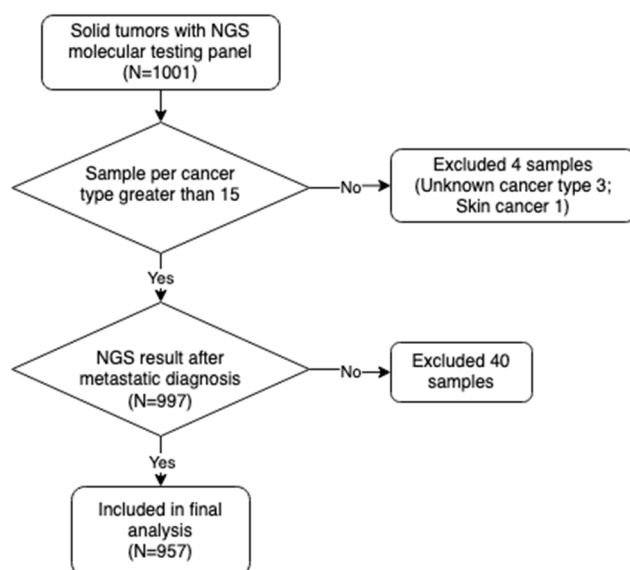

**Figure S1:** Study Flow Diagram Showing Metastatic Pan-cancer Patient Selection for Analysis. A total of 1001 patients with available FoundationOne CDx® test results were evaluated. Three patients with unknown cancer types, one patient with skin cancer and forty patients without test results after metastatic diagnosis were excluded, resulting in 957 eligible patients for the study analysis.

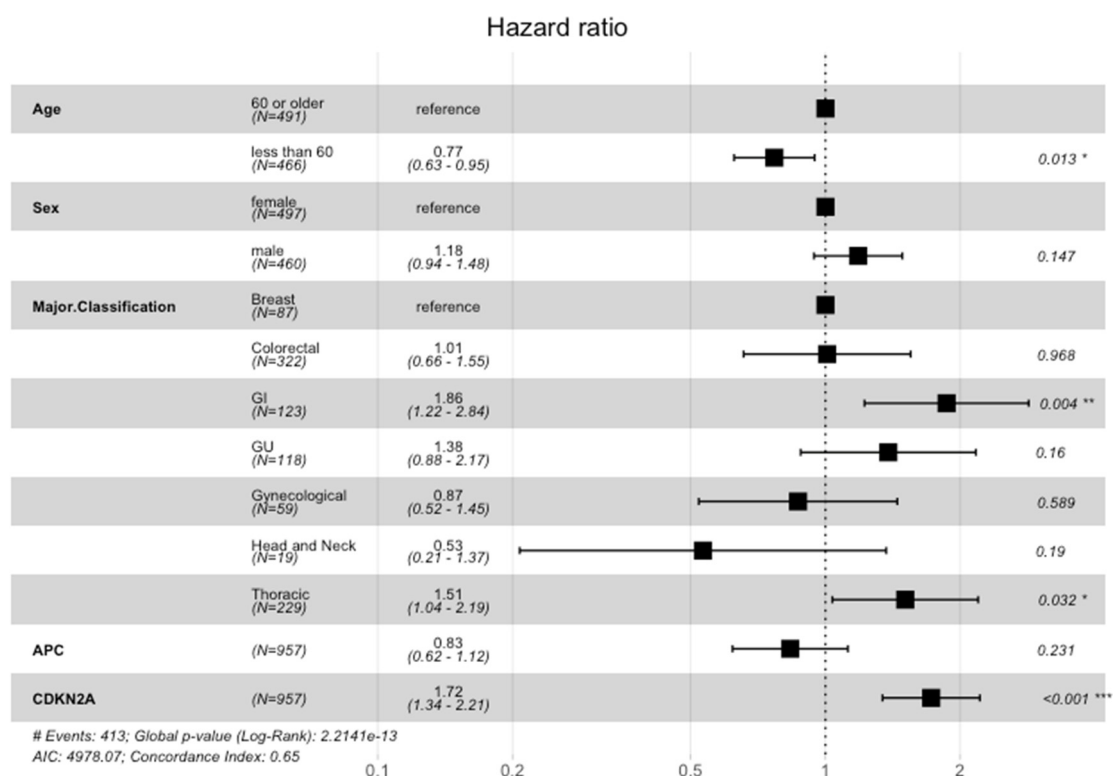

**Figure S2:** Forest plot of variables analyzed for overall survival. Hazard ratios of each variable along with the p-value are shown. Mutations in CDKN2A gene was associated

with significantly worse survival after adjusting for age at diagnosis, sex, APC mutations and cancer type.

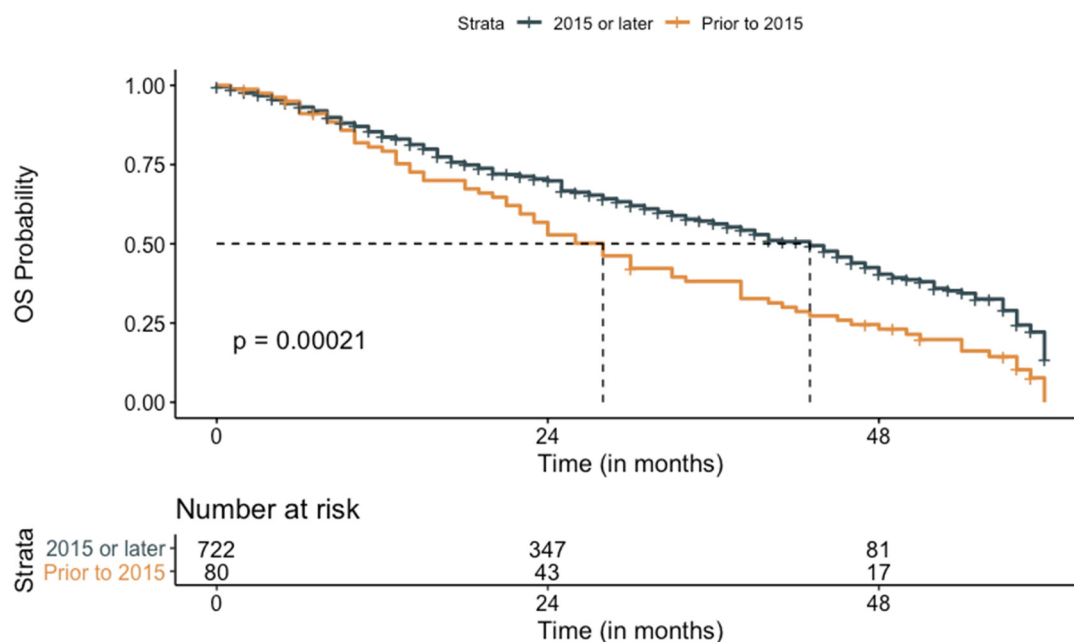

**Figure S3:** Kaplan-Meier overall survival analysis in solid pan-cancer metastatic patients five year after metastatic diagnosis. Patients who had the metastatic diagnosis before 2015 had significantly shorter overall survival compared to those diagnosed in 2015 or later.

**Table S1.** Summary of the specimen site classifications for the various cancer subgroups.

| Cancer               | Primary | Metastatic |
|----------------------|---------|------------|
| Breast Cancer        | 27      | 60         |
| Colorectal Cancer    | 192     | 139        |
| GI Cancer            | 79      | 44         |
| Thoracic cancer      | 166     | 83         |
| Genitourinary Cancer | 75      | 51         |
| Gynecological Cancer | 20      | 42         |
| Head and Neck Cancer | 7       | 12         |

**Table S2:** Prevalence in cases (%) of the top thirty mutated genes across seven cancer types.

|        | Breast (N=87) | Colorectal (N=322) | GI (N=123) | GU (N=118) | Gynecological (N=59) | Head and Neck (N=19) | Thoracic (N=229) |
|--------|---------------|--------------------|------------|------------|----------------------|----------------------|------------------|
| TP53   | 60.9          | 76.4               | 57.7       | 29.7       | 35.6                 | 47.4                 | 52               |
| APC    | 9.2           | 73.9               | 6.5        | 12.7       | 3.4                  | 10.5                 | 10.5             |
| KRAS   | 4.6           | 47.8               | 22         | 3.4        | 10.2                 | 10.5                 | 26.6             |
| LRP1B  | 14.9          | 17.7               | 21.1       | 20.3       | 15.3                 | 31.6                 | 27.1             |
| MLL2   | 18.4          | 16.5               | 17.9       | 33.1       | 16.9                 | 21.1                 | 16.2             |
| ARID1B | 14.9          | 15.2               | 17.1       | 18.6       | 13.6                 | 21.1                 | 17               |
| CDKN2A | 10.3          | 3.7                | 24.4       | 28.8       | 5.1                  | 26.3                 | 24.5             |
| MLL3   | 16.1          | 15.8               | 13         | 14.4       | 18.6                 | 15.8                 | 13.5             |
| PRKDC  | 23            | 14.9               | 13.8       | 16.1       | 13.6                 | 10.5                 | 10.9             |
| ARID1A | 11.5          | 9.6                | 25.2       | 16.1       | 13.6                 | 15.8                 | 15.3             |
| BRCA2  | 16.1          | 17.4               | 12.2       | 7.6        | 15.3                 | 15.8                 | 13.1             |
| ATM    | 14.9          | 12.4               | 14.6       | 16.1       | 8.5                  | 21.1                 | 12.7             |
| SPTA1  | 18.4          | 11.8               | 7.3        | 15.3       | 13.6                 | 15.8                 | 15.3             |
| FAT1   | 5.7           | 15.5               | 15.4       | 11.9       | 5.1                  | 31.6                 | 12.2             |
| PIK3CA | 32.2          | 13.7               | 7.3        | 12.7       | 20.3                 | 10.5                 | 6.6              |
| GNAS   | 13.8          | 19.6               | 15.4       | 4.2        | 5.1                  | 0                    | 8.3              |
| MLL    | 14.9          | 12.1               | 13.8       | 11         | 8.5                  | 10.5                 | 12.2             |
| GPR124 | 21.8          | 10.2               | 11.4       | 9.3        | 10.2                 | 15.8                 | 12.2             |
| ASXL1  | 8             | 17.7               | 8.1        | 8.5        | 8.5                  | 10.5                 | 8.3              |
| MYC    | 28.7          | 10.9               | 8.1        | 10.2       | 6.8                  | 0                    | 9.6              |
| SMAD4  | 3.4           | 20.5               | 17.9       | 0.8        | 1.7                  | 0                    | 6.1              |
| NOTCH1 | 17.2          | 10.9               | 9.8        | 11.9       | 3.4                  | 10.5                 | 10               |
| ERBB2  | 18.4          | 6.5                | 14.6       | 12.7       | 8.5                  | 0                    | 11.8             |
| MAP3K1 | 16.1          | 9.6                | 8.9        | 11         | 11.9                 | 26.3                 | 8.7              |
| CREBBP | 14.9          | 9.6                | 7.3        | 11.9       | 6.8                  | 5.3                  | 10.9             |
| EGFR   | 4.6           | 4                  | 4.9        | 6.8        | 0                    | 5.3                  | 28.4             |
| SPEN   | 13.8          | 12.7               | 12.2       | 6.8        | 5.1                  | 10.5                 | 7                |
| CDKN2B | 10.3          | 2.5                | 13.8       | 18.6       | 3.4                  | 5.3                  | 15.3             |
| IRS2   | 10.3          | 11.8               | 13.8       | 4.2        | 5.1                  | 10.5                 | 8.7              |
| MYST3  | 19.5          | 9.3                | 6.5        | 6.8        | 15.3                 | 5.3                  | 8.3              |

**Table S3:** List of all mutually exclusive and co-occurring gene pairs with false discovery rate (FDR) <0.01.

| Gene 1 | Gene 2 | p-value   | False Discovery Rate (FDR) | Mutually exclusive/co-occurring |
|--------|--------|-----------|----------------------------|---------------------------------|
| KRAS   | EGFR   | 3.86E-09  | 9.51E-07                   | Mutually exclusive              |
| CDKN2A | APC    | 7.06E-07  | 0.00016613                 | Mutually exclusive              |
| KRAS   | ERBB2  | 4.46E-06  | 0.00093275                 | Mutually exclusive              |
| VHL    | TP53   | 7.06E-06  | 0.00122194                 | Mutually exclusive              |
| RB1    | CDKN2B | 1.06E-05  | 0.00159381                 | Mutually exclusive              |
| VHL    | KRAS   | 2.25E-05  | 0.00321852                 | Mutually exclusive              |
| CCND1  | APC    | 6.35E-05  | 0.00957094                 | Mutually exclusive              |
| ZNF217 | AURKA  | -2.69E-14 | 0                          | Co-occurring                    |
| SRC    | AURKA  | -2.02E-14 | 0                          | Co-occurring                    |
| ZNF217 | SRC    | -1.71E-14 | 0                          | Co-occurring                    |
| CDKN2B | CDKN2A | -1.33E-14 | 0                          | Co-occurring                    |
| TOP1   | AURKA  | -1.07E-14 | 0                          | Co-occurring                    |
| TOP1   | BCL2L1 | -9.33E-15 | 0                          | Co-occurring                    |
| AURKA  | ARFRP1 | -8.66E-15 | 0                          | Co-occurring                    |
| BCL2L1 | ARFRP1 | -8.44E-15 | 0                          | Co-occurring                    |
| FLT3   | CDK8   | -6.88E-15 | 0                          | Co-occurring                    |
| ZNF217 | TOP1   | -6.00E-15 | 0                          | Co-occurring                    |
| FGF19  | CCND1  | -4.88E-15 | 0                          | Co-occurring                    |
| FGF3   | CCND1  | -4.88E-15 | 0                          | Co-occurring                    |
| SRC    | BCL2L1 | -3.33E-15 | 0                          | Co-occurring                    |
| ZNF217 | ARFRP1 | -2.44E-15 | 0                          | Co-occurring                    |
| FGF4   | FGF19  | -2.22E-15 | 0                          | Co-occurring                    |
| FGF4   | FGF3   | -2.22E-15 | 0                          | Co-occurring                    |
| SRC    | ASXL1  | -2.00E-15 | 0                          | Co-occurring                    |
| TOP1   | ARFRP1 | -1.11E-15 | 0                          | Co-occurring                    |
| TOP1   | SRC    | -6.66E-16 | 0                          | Co-occurring                    |
| TOP1   | ASXL1  | 2.22E-16  | 5.35E-14                   | Co-occurring                    |
| SRC    | ARFRP1 | 4.11E-15  | 9.59E-13                   | Co-occurring                    |
| ZNF217 | BCL2L1 | 5.11E-15  | 1.13E-12                   | Co-occurring                    |
| BCL2L1 | AURKA  | 5.55E-15  | 1.13E-12                   | Co-occurring                    |
| FGF4   | CCND1  | 5.55E-15  | 1.13E-12                   | Co-occurring                    |
| FGF3   | FGF19  | 6.88E-15  | 1.37E-12                   | Co-occurring                    |
| GNAS   | AURKA  | 1.09E-14  | 2.04E-12                   | Co-occurring                    |
| BCL2L1 | ASXL1  | 1.87E-14  | 3.44E-12                   | Co-occurring                    |
| GNAS   | ARFRP1 | 4.65E-14  | 8.42E-12                   | Co-occurring                    |
| AURKA  | ASXL1  | 1.41E-13  | 2.44E-11                   | Co-occurring                    |
| FLT3   | FLT1   | 1.74E-12  | 2.96E-10                   | Co-occurring                    |

|         |        |          |            |              |
|---------|--------|----------|------------|--------------|
| FLT1    | CDK8   | 1.99E-12 | 3.25E-10   | Co-occurring |
| GNAS    | BCL2L1 | 4.27E-12 | 6.76E-10   | Co-occurring |
| ZNF217  | ASXL1  | 6.97E-12 | 1.09E-09   | Co-occurring |
| ZNF217  | GNAS   | 1.11E-11 | 1.71E-09   | Co-occurring |
| TOP1    | GNAS   | 2.12E-11 | 3.15E-09   | Co-occurring |
| ASXL1   | ARFRP1 | 2.31E-11 | 3.37E-09   | Co-occurring |
| SRC     | GNAS   | 1.49E-10 | 2.13E-08   | Co-occurring |
| ZNF703  | FGFR1  | 2.74E-08 | 4.00E-06   | Co-occurring |
| RICTOR  | IL7R   | 7.03E-08 | 1.02E-05   | Co-occurring |
| ERBB2   | CDK12  | 4.03E-07 | 5.80E-05   | Co-occurring |
| GNAS    | ASXL1  | 7.52E-07 | 0.00010611 | Co-occurring |
| RUNX1T1 | PREX2  | 9.99E-07 | 0.00013928 | Co-occurring |
| ZNF703  | GPR124 | 1.55E-06 | 0.00021131 | Co-occurring |
| SDHA    | IL7R   | 3.20E-06 | 0.0004283  | Co-occurring |
| RUNX1T1 | MYC    | 3.99E-06 | 0.00052653 | Co-occurring |
| VHL     | PBRM1  | 1.15E-05 | 0.00150192 | Co-occurring |
| PRKDC   | PREX2  | 1.81E-05 | 0.00233896 | Co-occurring |
| STK11   | KEAP1  | 3.04E-05 | 0.00393447 | Co-occurring |
| MCL1    | DDR2   | 4.24E-05 | 0.00538202 | Co-occurring |
| PREX2   | MYC    | 6.15E-05 | 0.00761615 | Co-occurring |
| CDK8    | BRCA2  | 7.23E-05 | 0.00876214 | Co-occurring |
